# Supplementary material for: A generalised module for the selective extracellular accumulation of recombinant proteins
Source: PubMed Central journal article supplement (PMC3419692; doi:10.1186/1475-2859-11-69), 2012-05-28
Supplement: 1475-2859-11-69-S2.pdf [file 1475-2859-11-69-S2.pdf]

A.

1 - ATGAACAAAATCTACTCTATCAAATACTCTGCGGGACCGGGCGGTCTGATCGCGGTTTCT - 60  
1 - M N K I Y S I K Y S A A T G G L I A V S - 20  
*SacI*  
61 - GAGCTCGCCAAAAAGTTATCTGCAAAACCAACCGTAAAATCTCTGCGGGCGTGTGTCT - 120  
21 - E L A K K V I C K T N R K I S A A L L S - 40  
*EcoRV*  
121 - CTGGCGGTTATCTCTTACACCAACATCATCTACGCGCGGAACATGGATATCTCTAAAGCG - 180  
41 - L A V I S Y T N I I Y A A N M D I S K A - 60  
*BglII*  
181 - TGGGCGCGTGACTACCTAGATCTGGCGCAGAACAAAGGTGTTTTCCAGCCGGTTCTACC - 240  
61 - W A R D Y L D L A Q N K G V F Q P G S T - 80  
241 - CACGTTAAAATCAAACCTGAAAGACGGCACCGACTTCTCTTTCCGGCGCTGCCGGTGCCG - 300  
81 - H V K I K L K D G T D F S F P A L P V P - 100  
301 - GACTTCTCTTCTGCGACCGGAACGGTGC GGCGACCTCTATCGGTGGTGCTTACGCGGTT - 360  
101 - D F S S A T A N G A A T S I G G A Y A V - 120  
361 - ACCGTTGCTCACAACGCGAAAAACAAATCTTCTGCGAACTACCAGACCTACGTTTCTACC - 420  
121 - T V A H N A K N K S S A N Y Q T Y G S T - 140  
421 - CAGTACACCCAGATCAACCGTATGACCACCGCAACGACTTCTCTATCCAGCGTCTGAAC - 480  
141 - Q Y T Q I N R M T T G N D F S I Q R L N - 160  
481 - AAATACGTTGTTGAAACCCGTGGTGCCGACACCTCTTTCACTACAACGAAAAACAACAG - 540  
161 - K Y V V E T R G A D T S F N Y N E N N Q - 180  
*ClaI*  
541 - AACATCATCGATAGATACGGTGTGGACGTTGGTAAACGGTAAAAAAGAAATCATCGGTTTC - 600  
181 - N I I D R Y G V D V G N G K K E I I G F - 200  
601 - CGTGTGGTTCTGGTAACACCACCTTCTCTGGTATCAAAACCTCTCAGACCTACCAGGCG - 660  
201 - R V G S G N T T F S G I K T S Q T Y Q A - 220  
661 - GACCTGCTGTCTGCGTCTCTGTTCCACATCACCAACCTGCGTGCGAACACCGTTGGTGGT - 720  
221 - D L L S A S L F H I T N L R A N T V G G - 240  
721 - AACAAAGTTGAATACGAAAACGACTCTTACTTCACCAACCTGACCACCAACGGTACTCT - 780  
241 - N K V E Y E N D S Y F T N L T T N G D S - 260  
781 - GGTCTGGTGTTTACGTTTTTCGACAACAAAGAAGACAAATGGGTCTGCTGGGCACCACC - 840  
261 - G S G V Y V F D N K E D K W V L L G T T - 280  
*BstBI*  
841 - CACGGTATCATCGGTAACGGTAAAACCCAGAAAACCTACGTTACCCCGTTCGATTTCGAAA - 900  
281 - H G I I G N G K T Q K T Y V T P F D S K - 300  
901 - ACCACCAACGAACTGAAACAACCTGTTTCATCCAGAACGTGAACATCGACAACAACACCGCG - 960  
301 - T T N E L K Q L F I Q N V N I D N N T A - 320  
961 - ACCATCGGTGGTGGTAAAATCACCATCGGTAACACCACCCAGGACATCGAAAAAAACAAA - 1020  
321 - T I G G G K I T I G N T T Q D I E K N K - 340  
1021 - AACAAACGAAACAAAGACCTGGTTTTCTCTGGTGGTGGTAAAATCTCTCTGAAAGAAAAC - 1080  
341 - N N Q N K D L V F S G G G K I S L K E N - 360  
1081 - CTGGACCTGGGTACGGTGGTTTCATCTTCGACGAAAACAAAAATACACCGTTTCTGCG - 1140  
361 - L D L G Y G G F I F D E N K K Y T V S A - 380  
1141 - GAAGGTAACAACAACCTGACCTTCAAAGGTGCGGGTATCGACATCGGTAAAGGTTCTACC - 1200

381 - E G N N N V T F K G A G I D I G K G S T - 400  
 1201 - GTTGACTGGAACATCAAATACGCTTCTAACGACGCGCTGCACAAAATCGGTGAAGGTTCC - 1260  
 401 - V D W N I K Y A S N D A L H K I G E G S - 420  
 1261 - CTGAACGTGATCCAGGCGCAGAACACCAACCTGAAAACCGGCAACGGCACCGTTATCCTG - 1320  
 421 - L N V I Q A Q N T N L K T G N G T V I L - 440  
 1321 - GGTGCTCAGAAAACCTTCAACAACATCTACGTTGCGGGTGGGCCGGCACCGTTCAACTG - 1380  
 441 - G A Q K T F N N I Y V A G G P G T V Q L - 460  
 1381 - AACCGGAAAACGCGCTGGGTGAAGGTGACTACGCGGGTATCTTCTCACCGAAAACGGT - 1440  
 461 - N A E N A L G E G D Y A G I F F T E N G - 480  
 1441 - GGTAAACTGGACCTGAACGGTCACAACCAGACCTTCAAAAAAATCGCGGGCAGCGACTCT - 1500  
 481 - G K L D L N G H N Q T F K K I A A T D S - 500  
 1501 - GGCACCACCATCACCAACTCTAACACCACCAAAGAATCTGTTCTGTCTGTGAACAACCAG - 1560  
 501 - G T T I T N S N T T K E S V L S V N N Q - 520  
 1561 - AACAACTACATCTACCACGGTAACGTGGACGGTAACGTGCGTCTGGAACACCACCTGGAC - 1620  
 521 - N N Y I Y H G N V D G N V R L E H H L D - 540  
 1621 - ACCAAACAGGACAACGCGGTCTGATCCTGGACGGTGACATCCAGGCGAACTCTATCTCT - 1680  
 541 - T K Q D N A R L I L D G D I Q A N S I S - 560  
 1681 - ATCAAAAACGCGCCACTAGTTATGCAGGGTCACGCGACCGACCACGCGATCTTCCGTACC - 1740  
 561 - I K N A P L V M Q G H A T D H A I F R T - 580  
 1741 - ACCAAAACCAACAACCTGCCCGGAATTTCTGTGCGGTGTTGACTGGGTTACCCGTATCAAA - 1800  
 581 - T K T N N C P E F L C G V D W V T R I K - 600  
 1801 - AACCGGAAAACCTCTGTGAACCAGAAAAACAAAACCACCTACAAATCTAAACAACCAGGTT - 1860  
 601 - N A E N S V N Q K N K T T Y K S N N Q V - 620  
 1861 - TCTGACCTGTCTCAGCCGGACTGGGAAACCCGTAAATTCCGTTTCGACAACCTGAACATC - 1920  
 621 - S D L S Q P D W E T R K F R F D N L N I - 640  
 1921 - GAAGACTCTTCTCTGTCTATCGCGGTAAACGCGGACGTTGAAGGTAACATCCAGGCGAAA - 1980  
 641 - E D S S L S I A R N A D V E G N I Q A K - 660  
 1981 - AACTCTGTTATCAACATCGGTGACAAAACCGCGTACATCGACCCTGTACACTGGTAAAAAC - 2040  
 661 - N S V I N I G D K T A Y I D L Y S G K N - 680  
 2041 - ATCACCGGCGGGTTTACCTTCCGTACAGGACATCAAATCTGGTGACTCTATCGGTGAA - 2100  
 681 - I T G A G F T F R Q D I K S G D S I G E - 700  
 2101 - TCTAAATTCACCGCGGTATCATGGCGACCGGCTCCATCTCTATCGGTGACAAAGCG - 2160  
 701 - S K F T G G I M A T D G S I S I G D K A - 720  
 2161 - ATTGTTACCCTGAACACCGTTTTCTCTCTAGACCGGTACCGCGCTGACCATCCACAAAGGT - 2220  
 721 - I V T L N T V S S L D R T A L T I H K G - 740  
 2221 - GCGAACGTGACCGGTCTTCTTCTGTTCACCACCTCTAACATCAAATCTGGTGGTGAC - 2280  
 741 - A N V T A S S S L F T T S N I K S G G D - 760  
 2281 - CTGACCCTGACCGCGGACCGAATCTACCGCGAAATCACCCCGTCTATGTTCTACGCG - 2340  
 761 - L T L T G A T E S T G E I T P S M F Y A - 780  
 2341 - GCGGGTGGTTACGAACTGACCGAAGACGGCGCCAACTTACCGCGAAAACAGGCGTCT - 2400  
 781 - A G G Y E L T E D G A N F T A K N Q A S - 800

*PstI*

2401 - GTTACCGGCGACATCAAATCTGAAAAAGCGGCGAAACTGTCTTTTCGGTTCTGCAGACAAA - 2460  
801 - V T G D I K S E K A A K L S F G S A D K - 820

2461 - GACAACTCTGCGACCCGTTACTCTCAGTTCGCGCTGGCGATGCTGGACGGTTTCGACACC - 2520  
821 - D N S A T R Y S Q F A L A M L D G F D T - 840

2521 - TCTTACCAGGGTCTATCAAAGCGGCGCAGTCTTCTCTGGCGATGAACAACGCGCTGTGG - 2580  
841 - S Y Q G S I K A A Q S S L A M N N A L W - 860

2581 - AAAGTTACCGGCAACTCTGAACTGAAAAAATAACTCTACCGGCTCTATGGTTCTGTTC - 2640  
861 - K V T G N S E L K K L N S T G S M V L F - 880

2641 - AACGGTGGTAAAAACATCTTCAACACCCTGACCGTTGACGAACGACCACCTCTAACTCT - 2700  
881 - N G G K N I F N T L T V D E L T T S N S - 900

2701 - GCGTTCGTTATGCGTACCAACACCCAGCAGGCGGACCAACTGATCGTTAAAAACAACTG - 2760  
901 - A F V M R T N T Q Q A D Q L I V K N K L - 920

*SalI*

2761 - GAAGGTGCGAACAACTGCTGCTGCTGCATCGAAAAAAGGTAACGACAAAAAC - 2820  
921 - E G A N N L L L V D F I E K K G N D K N - 940

2821 - GGTCTGAACATCGACCTGGTTAAAGCGCCGAAAAACCTCTAAAGACGTTTTCAAACC - 2880  
941 - G L N I D L V K A P E N T S K D V F K T - 960

2881 - GAAACCCAGACCATCGGTTTCTCTGACGTTACCCCGGAAATCAAACAGCAGGAAAAAGAC - 2940  
961 - E T Q T I G F S D V T P E I K Q Q E K D - 980

2941 - GGTAATCTGTTTGGACCCTGACCGGCTACAAAACCGTTGCGAACGCGGACGCGCGAAA - 3000  
981 - G K S V W T L T G Y K T V A N A D A A K - 1000

*HpaI*

3001 - AAAGCGACCTCTCTGATGCTGGTGGTTACAAAGCGTTTCTGGCGGAACTTAACAACTG - 3060  
1001 - K A T S L M S G G Y K A F L A E V N\*\*N L - 1020

3061 - AACAAACGTATGGGTGACCTGCGTGACATCAACGGTGAACCGGGTGCCTGGGCGGATC - 3120  
1021 - N K R M G D L R D I N G E A G A W A R I - 1040

*EagI*

3121 - ATGTCTGGCACCAGCTCGGCCGTGGTGGTTTCTCTGACAACTACCCACGTTTCAGGTT - 3180  
1041 - M S G T G S A G G G F S D N Y T H V Q V - 1060

3181 - GGTGCGGACAACAACACGAACGACGCTGACGCTGTTACCGGCGTTACCATGACC - 3240  
1061 - G A D N K H E L D G L D L F T G V T M T - 1080

*NgoMIV*

3241 - TACACCGACTCTCACGCCGGCTCTGACGCTTCTCTGGTGAACCAAATCTGTTGGTGCG - 3300  
1081 - Y T D S H A G S D A F S G E T K S V G A - 1100

3301 - GGTCTGTACGCTTCTGCGATGTTTGAATCTGGTGCCTACATCGACCTGATCGGTAAATAC - 3360  
1101 - G L Y A S A M F E S G A Y I D L I G K Y - 1120

*KpnI*

3361 - GTTACCACGACAACGAATACACCGGACCTTCGCGGGTCTCGGTACCCTGACTACTCT - 3420  
1121 - V H H D N E Y T A T F A G L G T R D Y S - 1140

3421 - TCTCACTCTTGGTACGCGGGTGCAGGAGTGGTTACCGTTACCGACTCTGCG - 3480  
1141 - S H S W Y A G A E V G Y R Y H V T D S A - 1160

3481 - TGGATCGAACCGCAGGCGGAACGTTTACGGTGCGGTTTCTGGTAAACAGTTCTCTTGG - 3540  
1161 - W I E P Q A E L V Y G A V S G K Q F S W - 1180

3541 - AAAGACCAGGGTATGAACCTGACCATGAAAGACAAAGACTTCAACCCGCTGATCGGTCGT - 3600  
1181 - K D Q G M N L T M K D K D F N P L I G R - 1200

*AatII*

3601 - ACCGGCGTTGACGTCGGTAAATCTTTCTCTGGTAAAGACTGGAAAGTTACCGCGCGTGCG - 3660  
 1201 - T G V D V G K S F S G K D W K V T A R A - 1220

3661 - GGTCTGGGTTACCAGTTCGACCTGTTTCGCTAACGGTGAAACCGTTCGCGTGACGCTTCT - 3720  
 1221 - G L G Y Q F D L F A N G E T V L R D A S - 1240

3721 - GGTGAAAACGTATCAAAGGTGAAAAGACGGTCGTATGCTGATGAACGTGGGTCTGAAC - 3780  
 1241 - G E K R I K G E K D G R M L M N V G L N - 1260

3781 - GCGGAAATCCGTGACAACGTGCGTTTCGGTCTGGAATTCGAGAAATCTGCGTTCGGTAAA - 3840  
 1261 - A E I R D N V R F G L E F E K S A F G K - 1280

3841 - TACAACGTGGACAACGCGATCAACGCGAACTTCCGTTACTCTTTCTGA - 3888  
 1281 - Y N V D N A I N A N F R Y S F \* - 1300

## B.

### Pmp17

1 - AACGACGCGCAGACCGCGCTGACCCCGTCTGACTCTTACAACGGTAAACGTTACCTCTGAA - 60  
 1 - N D A Q T A L T P S D S Y N G N V T S E - 20

61 - GAATTCCAGGTTAAAGAAACCTCTTCTGGTACCACCTACACCTGCGAAGGTAACGTTTGC - 120  
 21 - E F Q V K E T S S G T T Y T C E G N V C - 40

121 - ATCTCTTTCGCGGGTAAAGACTCTGGTCTGAAAAATCTTGCTTCTCTGCGACCGACAAC - 180  
 41 - I S F A G K D S G L K K S C F S A T D N - 60

181 - CTGACCTTCCTGGGTAACGGTTACACCCTGTGCTTCGACAACATCACCACCACCGCGTCT - 240  
 61 - L T F L G N G Y T L C F D N I T T T A S - 80

241 - AACCCGGGTGCGATCAACGTTTCAGGGTCAGGGTAAAACCTGGGTATCTCTGGTTTCTCT - 300  
 81 - N P G A I N V Q G Q G K T L G I S G F S - 100

301 - CTGTTCTCTTGCGGCTACTGCCCGCGGGTACCACCGGTTACGGTGCGATCCAGACCAA - 360  
 101 - L F S C A Y C P P G T T G Y G A I Q T K - 120

361 - GGTAACACCACCCTGAAAGACAACCTCTTCTCTGGTTTTCCACAAAACTGCTCTACCGCG - 420  
 121 - G N T T L K D N S S L V F H K N C S T A - 140

421 - GAAGGTGGTGCATCCAGTGCAAAGGTTCTTCTGACGCGGAACTGAAAATCGAAAACAAC - 480  
 141 - E G G A I Q C K G S S D A E L K I E N N - 160

481 - CAGAACCTGGTTTTCTCTGAAAACCTTCTACTCTAAAGGTGGTGCATCTACGCGGAC - 540  
 161 - Q N L V F S E N S S T S K G G A I Y A D - 180

541 - AAAGTACCATCGTTTCTGGTGGTCCGACCCTGTTCTTAACAACCTCTGTTTCTAACGGT - 600  
 181 - K L T I V S G G P T L F S N N S V S N G - 200

601 - TCTTCTCCGAAAGGTGGTGCATCTCTATCAAAGACTCTTCTGGTGAATGCTCTCTGACC - 660  
 201 - S S P K G G A I S I K D S S G E C S L T - 220

661 - GCGGACCTGGGTGACATCACCTTCGACGGTAACAAAATCATCAAACCTCTGGTGGTTCT - 720  
 221 - A D L G D I T F D G N K I I K T S G G S - 240

721 - TCTACCGTTACCCGTAACCTCTATCGACCTGGGTACCGGTAAATTCACCAAACCTGCGTGCG - 780  
 241 - S T V T R N S I D L G T G K F T K L R A - 260

781 - AAAGACGGTTTCGGTATCTTCTTCTACGACCCGATCACCGGTGGTGGTTCTGACGAACTG - 840  
 261 - K D G F G I F F Y D P I T G G G S D E L - 280  
  
 841 - AACATCAACAAAAAGAAACCGTTGACTACACCGGTAAAATCGTTTTCTCTGGTAAAAA - 900  
 281 - N I N K K E T V D Y T G K I V F S G E K - 300  
  
 901 - CTGTCTGACGAAGAAAAAGCGCGTGCGGAAAACCTGGCGTCTACCTTCAACCAGCCGATC - 960  
 301 - L S D E E K A R A E N L A S T F N Q P I - 320  
  
 961 - ACCCTGTCTGCGGGTCTCTGGTTCTGAAAGACGGTGTCTTCTGTTACCGCGAAACAGGTT - 1020  
 321 - T L S A G S L V L K D G V S V T A K Q V - 340  
  
 1021 - ACCCAGGAAGCGGGTCTACCGTTGTTATGGACCTGGGTACCACCCTGCAAACCCCGTCT - 1080  
 341 - T Q E A G S T V V M D L G T T L Q T P S - 360  
  
 1081 - TCTGGTGGTGAACCATCACCTGACCAACCTGGACATCAACATCGCGTCTCTGGGTGGT - 1140  
 361 - S G G E T I T L T N L D I N I A S L G G - 380  
  
 1141 - GGTGGTGGTACCTCTCCGGCGAAACTGGCG - 1170  
 381 - G G G T S P A K L A

## YapA

1 - GTTTCTCAGATCGCGACCACCGACACCCCGCGGTTACCCCGATCAAATCTACCCTGACC - 60  
 1 - V S Q I A T T D T P A V T P I K S T L T - 20  
  
 61 - GGTCCGTTTGAGCGTAACTCTGCGGGTACCTCTTTTCGGTTCTAACGTTGACGTTGACGTT - 120  
 21 - G P F E R N S A G T S F G S N V D V D V - 40  
  
 121 - ATCGACAACACCTCTACCGCGACCCGTGTTATCGCGGAAACCACCCCGAAGCGGAATCT - 180  
 41 - I D N T S T A T R V I A E T T P E A E S - 60  
  
 181 - ACCATCGGTGAAGCGACCGGTCAGGAAGGTGGTAAACGCGACCGCGGTTATCCCGCCGACC - 240  
 61 - T I G E A T G Q E G G N A T A V I P P T - 80  
  
 241 - ACCACCCCGTCTGAACAGGAAATCACCGAACCGGAACAGCCGGTCTGCTGGACAAAATC - 300  
 81 - T T P S E Q E I T E P E Q P G L L D K I - 100  
  
 301 - AAAGACCTGCTGGGTCTGGGTGAAATCACCCAGGAACAGGCGGACGCGCTGGAAAAAAC - 360  
 101 - K D L L G L G E I T Q E Q A D A L E K N - 120  
  
 361 - GTTAAAACCAAAGTTGAAAAAGTTGACGCGCAGACCGCGGCGAAACTGGCGCTGGAATCT - 420  
 121 - V K T K V E K V D A Q T A A K L A L E S - 140  
  
 421 - GCGCAGGCGGAAGCGCAGAAAGCGGCGGAAGACGCGCTGTACCTGAAAACCGAAAACGTT - 480  
 141 - A Q A E A Q K A A E D A L Y L K T E N V - 160  
  
 481 - TCTTACCAGGCGTTCGCGCAGACCGAAGAAAAATCAAAAAAGAAGCGGACGAAGCGAAA - 540  
 161 - S Y Q A F A Q T E E K I K K E A D E A K - 180  
  
 541 - AAAAAACAGGACAAAACCAAAGAAGACGCGATCAAAGCGGTTAAAGTTAACAACACCCCG - 600  
 181 - K K Q D K T K E D A I K A V K V N N T P - 200  
  
 601 - CTGGTTCCGGGTGACAAAAGACATCGCGGAAAAAGTTACCAAAGCGGTTACCGACACCACC - 660

201 - L V P G D K D I A E K V T K A V T D T T - 220  
661 - AAAGTTCAGGGTGAAAAAGCGGTTACCCTGGCGACCAAATCACCACGCGGAAAGTTGCG - 720  
221 - K V Q G E K A V T L A T K I T D A K V A - 240  
721 - CAGGAAAAAAAAAGACGCGAACACCGAAGCGCTGGCGGAAATCGACGGTCGTCTGATCTCT - 780  
241 - Q E K K D A N T E A L A E I D G R L I S - 260  
781 - GTTTCTAACGCGCTGATCCAGGCGACCGGTACCGACAAAGGTCCGCTGGACCAGAACTG - 840  
261 - V S N A L I Q A T G T D K G P L D Q K L - 280  
841 - AAAGAAGCGCAGCAGGCGAAAAACCGAACAGGACGGTAAAGAAGTGGCGTCTGGTGGTTAC - 900  
281 - K E A Q Q A K T E Q D G K E L A S G G Y - 300  
901 - AAAGAAGTGTGAGGAAGACAAAAAACCTCTGGTACTTCGGTATCGCGGAAAAACGAC - 960  
301 - K E L F E E D K K T S G Y F G I A E N D - 320  
961 - AACGGTCTGGTCAGCAGGAAAACTGGCGGAAAGCGAAAAAACCGTGACGCGTACAAC - 1020  
321 - N G S G Q Q E K L A E A K K N R D A Y N - 340  
1021 - AAAGCGGCGAAAAAGAAGTGGACGCGATCGCGAAAGCGCAGAAAGCGGTTGAAGCGATC - 1080  
341 - K A A K K E L D A I A K A Q K A V E A I - 360  
1081 - GACGCGCAGATCGTTAACTGAAAAAGACAAAGGTGACATCGAACAGGAACAGTCTACC - 1140  
361 - D A Q I V K L K K D K G D I E Q E Q S T - 380  
1141 - GAAAAAGGTAAACCGGTGGTCTGGACATCGCGCTGTCTGGTGCGAACGACGCGAAAGAC - 1200  
381 - E K G K T G G L D I A L S G A N D A K D - 400  
1201 - GCGGCGCAGGGTGAATTCGACACCGCGAAAAACCGGCGGAACTGGCGGAAACCGCGGCG - 1260  
401 - A A Q G E F D T A K N A A E L A E T A A - 420  
1261 - AAAGCGATCGAAGCGGCGAAAAATCACCACAAAGCGGTTGAAGACGCGACCGCGGCGTAC - 1320  
421 - K A I E A A K I T D K A V E D A T A A Y - 440  
1321 - AAAGAAGCGGCGGACAAAGCGGAACAGACCAAAACCGCGCTGGAAGCGGCGGAAAAAGCG - 1380  
441 - K E A A D K A E Q T K T A L E A A E K A - 460  
1381 - AAAGAAGACGCGGACAAACTGGTTGTTACCAACACCGGTCTGCTGAACGACGCGGACCAG - 1440  
461 - K E D A D K L V V T N T G L L N D A D Q - 480  
1441 - GCGCTGGAACAGCTGGTTACCGCGCAGAACAACCGCGCAGCCGACCCTGGACCTGCCGGCG - 1500  
481 - A L E Q L V T A Q N N A Q P T L D L P A - 500  
1501 - ATCGACGTTACCATCGCGCCGGCGAAAAACCCAGGACGTTATCGAAGGTACCTCTGCGATC - 1560  
501 - I D V T I A P A K T Q D V I E G T S A I - 520  
1561 - GCGACCCAGGTTGCGGGTGGTACCCAGAAGCTTGCAGAAAGGTGGTAAAGCGATCGACTCT - 1620  
521 - A T Q V A G G T Q N V A K G G K A I D S - 540  
1621 - GTTATACCAAAGACGGTATCGTTAACCTGGCGGCGGGTGCAGAACGCGAAAGGTACCGAA - 1680  
541 - V I T K D G I V N L A A G A N A K G T E - 560  
1681 - GTTACCAAAGGTACCCTGAACAACAACGGTGGTGGTACACCGACACCGTTGTTTCTACC - 1740  
561 - V T K G T L N N N G G V D T D T V V S T - 580  
1741 - GAAGGTAAACTGGTTCTGACCGGTGGTCTGAAACCGCGATCGCGACCTCTACCGGTGCG - 1800  
581 - E G K L V L T G G S E T A I A T S T G A - 600  
1801 - AAAGTTGCGGAAGTGGTGGTGGTACCGGCGGTGACCACTCTGTTATCGAAAAATGATC - 1860  
601 - K V A E G G V V T A G D H S V I E K M I - 620

1861 - TCTTCTGGTAACGTTACCGCGTCTGGTAACAACACCATCGTTCGTGACACCACCATCAAC - 1920  
621 - S S G N V T A S G N N T I V R D T T I N - 640

1921 - GACGGTAAACTGTCTCTGGCGGGTACCGCGACCGGAACAACACCACCTTCAACGGTGGT - 1980  
641 - D G K L S L A G T A T A N N T T F N G G - 660

1981 - ATCTTCTCTGTTGAAGGTGACACCGCGGCGACCAAAACCAACATGACCGGTGGTAAATTC - 2040  
661 - I F S V E G D T A A T K T N M T G G K F - 680

2041 - GCGGTTACCGGTAACGCGAAAATCGAAGAAACCGTTGTTTCTGCGGGTGACGTTTCTCTG - 2100  
681 - A V T G N A K I E E T V V S A G D V S L - 700

2101 - GCGGACAAAGCGACCGGAACAACACCACCTGACCGGTGGTACCTTCGCGGGCGGGGT - 2160  
701 - A D K A T A N N T T L T G G T F A A A G - 720

2161 - GACACCGCGTTCGCGACCAACATGACCGGTGGTACCTTCACCGTTGCGGGTGACACC - 2220  
721 - D T A V S A T N M T G G T F T V A G D T - 740

2221 - GCGGCGACCAAAACCAAAATGACCGGTGGTGAATTCGCGGTTACCGGTAACGCGAAAATC - 2280  
741 - A A T K T K M T G G E F A V T G N A K I - 760

2281 - GAAGACACCGTTCGAAACGCGTCTGACTTCTCTCTGGCGGACAAAGCGACCGGAACAAC - 2340  
761 - E D T V L N A S D F S L A D K A T A N N - 780

2341 - ACCACCTGACCGACGGTACCTTCACCGTTGCGGGTGACGCGGCGGTTACCGCGACCAAC - 2400  
781 - T T L T D G T F T V A G D A A V T A T N - 800

2401 - ATGTCTGGTGGTAAATTCGCGGTTAAAGGTAAAGCGAAAATCAAAGACACCAGCTGTCT - 2460  
801 - M S G G K F A V K G K A K I K D T Q L S - 820

2461 - GCGGGTAACTTCACCTGGCGGAAAACGCGACCGGAACGACACCACCTGAACGGTGGT - 2520  
821 - A G N F T L A E N A T A N D T T L N G G - 840

2521 - AAATTCGACGTTTCTAACGAAGCGACCGCGACCAACACCACCATCAACAACGGTCTGTTC - 2580  
841 - K F D V S N E A T A T N T T I N N G L F - 860

2581 - ACCCTGAAAGACGGTGCGCACGCGACTCTACCACCGTAACTCTGGTACCTTCGTTATG - 2640  
861 - T L K D G A H A D S T T V N S G T F V M - 880

2641 - GCGGACAGTCTACCGGAACGGTATCCAGCTGGTTGACTCTGCGTTCACCTGGCGTCT - 2700  
881 - A D Q S T A N G I Q L V D S A F T L A S - 900

2701 - GGTGCGAAAGCGTCTGGTATCACCAAACGACCGGTGGTCAGGCGAGGTTGCGGGTCT - 2760  
901 - G A K A S G I T K L T G G Q A Q V A G S - 920

2761 - CTGGAATCTCTGTCTCTGACCGGTGGTCGTGCGGACTTCGCGAACTCTGCGAAAGCGTCT - 2820  
921 - L E S L S L T G G R A D F A N S A K A S - 940

2821 - GGTCTGCTGGACATCTCTGCGGACTCTCAGATCATTATGAACCGTGGTGCGGACACCGG - 2880  
941 - G L L D I S A D S Q I I M N R G A D T A - 960

2881 - CAGGCGAACCTGAACCTGGCGGGTCTGGAACCTGCTGGCGTCTGACGTTGCGCAGGCG - 2940  
961 - Q A N L N L A G R L E L L A S D V A Q A - 980

2941 - GTTGCAGCCGTTGCGCGTGCGGCGATGAACTGTCTAACGCGGTTGCGGTTATGCCG - 3000  
981 - V A Q P V A R A A M E L S N A R A V M P - 1000

3001 - GCGCCGCGATGCCGTTCCGGCGGCGCGCGGTTGCGCACTTCGCGCTGAACGACGTT - 3060  
1001 - A P A M P V P A A A P V A H F A L N D V - 1020

3061 - GTTATGACCGGTGGTACCGTTGACATGTCTAACCGG - 3096  
1021 - V M T G G T V D M S N A

## SapA

1 - ACCACCTATGATACCTGGACCTATTATGATAATCCGACCACCGCGCTGGATTGGAACAAC - 60  
1 - T T Y D T W T Y Y D N P T T A L D W N N - 20

61 - ATGGATGCCGCGGGCACCGTGGATGGCAACTATGTGAACTATAGCGGCTTTGTGTATTAT - 120  
21 - M D A A G T V D G N Y V N Y S G F V Y Y - 40

121 - AACAAACGCGAACGGCGATTTTGGATCAGACCTTTAACGGCGATACCGTGAACGGCACCATT - 180  
41 - N N A N G D F D Q T F N G D T V N G T I - 60

181 - AGCACCTATTATCTGAACCATGATTATAACGATGCGACCTCGAACGAACTGAACATTAGC - 240  
61 - S T Y Y L N H D Y N D A T S N E L N I S - 80

241 - AACAGCGTGATTCATGGCAGCATTACCAGCATGCTGCCGATTGGCTACTACGATCGCTTT - 300  
81 - N S V I H G S I T S M L P I G Y Y D R F - 100

301 - GATACCCTGGATCATGATGGCTATAGCGAATATTATCGCTTTAACAAACGGCACGGATACC - 360  
101 - D T L D H D G Y S E Y Y R F N N G T D T - 120

361 - GTCGATGGCAATTGGTATGATGGCGATGTGTTTACCCTGAACATTGCGAACAGCACCATC - 420  
121 - V D G N W Y D G D V F T L N I A N S T I - 140

421 - GATGATGATTATGAAGCGTTTTATTTTACCAGATAGCTATAAAGATGGCGATGTCACCAAA - 480  
141 - D D D Y E A F Y F T D S Y K D G D V T K - 160

481 - TATACCAACGAAACCTTTGATGTGTCCGAAGCGTGGCGGTGAACCTGGATGTGGAAAGC - 540  
161 - Y T N E T F D V S E G V A V N L D V E S - 180

541 - AACATTAACATCAGCAACAACAGCCGCGTGGCGGGCATTGCGCTGTCCAGGGCAACACC - 600  
181 - N I N I S N N S R V A G I A L S Q G N T - 200

601 - TATAACAACACCTATAACCACCGAAAGCCATAACTGGGATAACAACATCAACGTGTTTGAT - 660  
201 - Y N N T Y T T E S H N W D N N I N V F D - 220

661 - AGCACCGTGACCAGCGGCAGCGATTATATTCTGGATAGCGCGTATACCACCGATACCGGC - 720  
221 - S T V T S G S D Y I L D S A Y T T D T G - 240

721 - ACCTTTGGCACCGGCCATTTTGGCAACAGCGATGAACCGAGCGATTATACCGGTGCGGGT - 780  
241 - T F G T G H F G N S D E P S D Y T G A G - 260

781 - GATGTCGCGCTGTCCTTTACCAGATGATAACGGCGCGAGCGATTATGCGATGAAAAACAAC - 840  
261 - D V A L S F T D D N G A S D Y A M K N N - 280

841 - GTGTATTTTAGCAACAGCACCTGATGGCGATGTGAAATTTACCAGCAACTGGAACGCG - 900  
281 - V Y F S N S T L M G D V K F T S N W N A - 300

901 - AACTTTGATGCGGATGGCGATGATACCAATGGCGATGGCGTCCCGGATACCAACCATGGC - 960  
301 - N F D A D G D D T N G D G V P D T N H G - 320

961 - TGGGCGGATGATGGCCTGAACGTGGATGAACTGAACTGACCCTGGATAACGGCAGCAAA - 1020  
321 - W A D D G L N V D E L N L T L D N G S K - 340

1021 - TGGGTGGGCCAGGCGACCTATACCGTGGATACCACGAGCCGCATGTATGATGTGGAACC - 1080  
341 - W V G Q A T Y T V D T T S R M Y D V E T - 360

1081 - AATAGCCTGACCCCGGTGCGACGCTGGAAGATAACGCGTGAACCGCATTGTGGGCAAC - 1140



361 - N S L T P G A T L E D N A W N R I V G N - 380  
 1141 - GAAGTGTTCAGAGCGGCGTGTTCACGTGACGCTGAACAATGGCTCGGAATGGGATACC - 1200  
 381 - E V F Q S G V F N V T L N N G S E W D T - 400  
 1201 - GTGGGCGATAGCACGGTGGATACCCTGGCGGTGAACAACGGCAGCCAGGTGAACGTGAGC - 1260  
 401 - V G D S T V D T L A V N N G S Q V N V S - 420  
 1261 - AACAGCGATCTGACCAGCGATAACCATTGATCTGACCAACGGCAGCAGCCTGAATATTGGC - 1320  
 421 - N S D L T S D T I D L T N G S S L N I G - 440  
 1321 - GAAGGCGGCTATGTGGATAACCGATCATCTGACCATTGATAGCTATAGCACCGTGGGCGCTG - 1380  
 441 - E G G Y V D T D H L T I D S Y S T V G L - 460  
 1381 - ACCGAAAGCACCGGCTGGTCCACCTATAGCAACCTGTATGCGAACACCATTACCGTCACC - 1440  
 461 - T E S T G W S T Y S N L Y A N T I T V T - 480  
 1441 - AATGGCGGCGTGTGGATGTGAACGTGGGCCAGTTTGATAACCGAAGTGTTCAGCACCGAT - 1500  
 481 - N G G V L D V N V G Q F D T E V F S T D - 500  
 1501 - AAAGTGAAGTACGAGCGGCAACACCGCGATCATAACGGCAACGTGGTGAGCGGCGTC - 1560  
 501 - K L E L T S G N T A D H N G N V V S G V - 520  
 1561 - TTTAATATTCACAGCAGCGATTATGTGCTGAACCGGATCTGGTGAACGATCGCACCTGG - 1620  
 521 - F N I H S S D Y V L N A D L V N D R T W - 540  
 1621 - GATACCACGCGAGGCGAACTATGGCTATGGCACCATTGCGATGAACAGCGATGGC - 1674  
 541 - D T T Q A N Y G Y G T I A M N S D G

## Pertactin

1 - GACTGGAACAACCAGTCTATCGTTAAAACCGGTGAACGTCAGCACGGTATCCACATCCAG - 60  
 1 - D W N N Q S I V K T G E R Q H G I H I Q - 20  
 61 - GGTTCTGATCCGGTGGTGTTCGTACCGGCTCTGGTACCACCATCAAAGTTTCTGGTTCGT - 120  
 21 - G S D P G G V R T A S G T T I K V S G R - 40  
 121 - CAGGCGCAGGGTATCCTGCTGGAAAACCCGGCGGCGGAACTGCAGTTCGTAACGGTTCT - 180  
 41 - Q A Q G I L L E N P A A E L Q F R N G S - 60  
 181 - GTTACCTCTTCTGGTCAACTGTCTGACGACGGTATCCGTCGTTTCTGGGTACCGTTACC - 240  
 61 - V T S S G Q L S D D G I R R F L G T V T - 80  
 241 - GTTAAAGCGGTAAACTGGTTGCGGACCACGCGACCCTGGCGAACGTTGGTGACACCTGG - 300  
 81 - V K A G K L V A D H A T L A N V G D T W - 100  
 301 - GACGACGACGGTATCGCGCTGTACGTTGCGGGTGAACAGGCGCAGGCGTCTATCGCGGAC - 360  
 101 - D D D G I A L Y V A G E Q A Q A S I A D - 120  
 361 - TCTACCCTGCAGGGTGCAGGGTGGTGTTCAGATCGAACGTTGGTGCGAACGTTACCGTTACG - 420  
 121 - S T L Q G A G G V Q I E R G A N V T V Q - 140  
 421 - CGTTCTGCTATCGTTGACGGTGGTCTGCACATCGGTGCGCTGCAGTCTCTGCAGCCGGAA - 480  
 141 - R S A I V D G G L H I G A L Q S L Q P E - 160  
 481 - GACCTGCCGCCGCTCTCGTGTGTTCTGCGTGACACCAACGTTACCGCTGTTCCGGCGTCT - 540  
 161 - D L P P S R V V L R D T N V T A V P A S - 180  
 541 - GGTGCTCCGGCGGCGGTTTCTGTTCTGGGTGCGTCTGAACTGACCCTGGACGGTGGTCAC - 600  
 181 - G A P A A V S V L G A S E L T L D G G H - 200

601 - ATCACCGGTGGTTCGTGCGGCGGGTGTTCGGCGATGCAGGGTGCGGTTGTTACCTGCAG - 660  
 201 - I T G G R A A G V A A M Q G A V V H L Q - 220  
  
 661 - CGTGCGACCATCCGTTCGTGGTGACGCTCCGGCGGGTGGTGCGGTTCCGGGTGGTGCGGTT - 720  
 221 - R A T I R R G D A P A G G A V P G G A V - 240  
  
 721 - CCGGGTGGTGCGGTTCCGGGTGGTTTTCGGTCCGGGTGGTTTTCGGTCCGGTTCTGGACGGT - 780  
 241 - P G G A V P G G F G P G G F G P V L D G - 260  
  
 781 - TGGTACGGTGTGACGTTTCTGGTTCTTCTGTTGAACTGGCGCAGTCTATCGTTGAAGCG - 840  
 261 - W Y G V D V S G S S V E L A Q S I V E A - 280  
  
 841 - CCGGAACTGGGTGCGGCGATCCGTGTTGGTTCGTGGTGCAGCGTGTACCAGTTTCTGGTGGT - 900  
 281 - P E L G A A I R V G R G A R V T V S G G - 300  
  
 901 - TCTCTGTCTGCGCCGACGGTAACGTTATCGAAACCGGTGGTGCAGCGTTCGTTTCGCGCCG - 960  
 301 - S L S A P H G N V I E T G G A R R F A P - 320  
  
 961 - CAGGCTGCGCCGCTGTCTATCACCCCTGCAGGCGGGCGCGCACGCGCAGGGTAAAGCTCTG - 1020  
 321 - Q A A P L S I T L Q A G A H A Q G K A L - 340  
  
 1021 - CTGTACCGTGTTCGCGGAACCGGTTAAACTGACCCTGACCAGGTGGTGCAGCGCGCAG - 1080  
 341 - L Y R V L P E P V K L T L T G G A D A Q - 360  
  
 1081 - GGTGACATCGTTGCGACCGAACTGCCGTCTATCCCGGCTACCTCTATCGGTCCGCTGGAC - 1140  
 361 - G D I V A T E L P S I P A T S I G P L D - 380  
  
 1141 - GTTGCCTGGCGTCTCAGGCGCGTTGGACCGGTGCGACCCGTGCGGTTGACTCTCTGTCT - 1200  
 381 - V A L A S Q A R W T G A T R A V D S L S - 400  
  
 1201 - ATCGACAACGCGACCTGGGTTATGACCGACAACCTAACGTTGGTGCAGCTGCGTCTGGCG - 1260  
 401 - I D N A T W V M T D N S N V G A L R L A - 420  
  
 1261 - TCTGACGGTTCTGTTGACTTCCAGCAACCGCGGAAGCGGGTCGTTTCAA - 1311  
 421 - S D G S V D F Q Q P A E A G R F K

## mCherry

1 - ATGTTTTCTAAAGGTGAAGAAGACAACATGGCTATCATCAAAGAATTTATGCGTTTTCAA - 60  
 1 - M V S K G E E D N M A I I K E F M R F K - 20  
  
 61 - GTTCACATGGAAGGTTCTGTGAACGGTCACGAATTTGAAATCGAAGGTGAAGGTGAAGGT - 120  
 21 - V H M E G S V N G H E F E I E G E G E G - 40  
  
 121 - CGTCCGTATGAAGGCACCCAGACCGCTAAACTGAAAGTTACCAAAGGTGGTCCGCTGCCG - 180  
 41 - R P Y E G T Q T A K L K V T K G G P L P - 60  
  
 181 - TTCGCTTGGGACATCTGTCTCCGAGTTTCATGTACGTTTCTAAAGCGTATGTTAAACAC - 240  
 61 - F A W D I L S P Q F M Y G S K A Y V K H - 80  
  
 241 - CCGGCTGACATCCCGACTACCTGAAACTGTCTTTCCCGGAAGGTTTCAAATGGGAACGT - 300  
 81 - P A D I P D Y L K L S F P E G F K W E R - 100  
  
 301 - GTTATGAACTTTGAAGACGGTGGTGTGTTACCGTTACCCAGGACTCTTCTCTGCAAGAC - 360  
 101 - V M N F E D G G V V T V T Q D S S L Q D - 120  
  
 361 - GGTGAATTTATCTACAAAGTTAAACTGCGTGGCACCAACTTCCCGTCTGACGGTCCGGTT - 420  
 121 - G E F I Y K V K L R G T N F P S D G P V - 140



```

161 - A A I G L S M A G S S A M I L A A Y H P - 180
541 - CAGCAGTTCATCTACGCTGGTTCTCTGTCTGCTCTGCTGGACCCGTCTCAGGGTATGGGT - 600
181 - Q Q F I Y A G S L S A L L D P S Q G M G - 200
601 - CCGTCTCTGATCGGTCTGGCTATGGGTGACGCTGGTGGTTACAAAGCTGCTGATATGTGG - 660
201 - P S L I G L A M G D A G G Y K A A D M W - 220
661 - GGTCCGTCTTCTGACCCGGCTTGGGAACGTAACGACCCGACGCAGCAGATCCCGAAACTG - 720
221 - G P S S D P A W E R N D P T Q Q I P K L - 240
721 - GTTGCTAACAACACCCGTCTGTGGGTTTACGGTGGTAACGGCACCCCGAACGAACTGGGT - 780
241 - V A N N T R L W V Y G G N G T P N E L G - 260
781 - GGTGCTAACATCCCGGCTGAATTTCTGGAAAACCTTCGTTTCGTTCTTCTAACCTGAAATTC - 840
261 - G A N I P A E F L E N F V R S S N L K F - 280
841 - CAGGACGCTTACAACGCTGCTGGTGGTCACAACGCTGTTTTCAACTTCCCGCCGAACGGC - 900
281 - Q D A Y N A A G G H N A V F N F P P N G - 300
901 - ACCCACTCTTGGGAATACTGGGGTGCTCAACTGAACGCTATGAAAGGTGACCTGCAATCT - 960
301 - T H S W E Y W G A Q L N A M K G D L Q S - 320
961 - TCTCTGGGTGCTGGTGGCGGC - 981
321 - S L G A G G G

```

**Figure S2. Nucleotide sequences of the *de novo* synthesised *pet* gene and heterologous DNA encoding proteins targeted for secretion. A.** The nucleotide sequence of the *pet* gene was codon optimised for expression in *E. coli*. Subsequently the sequence was checked for six base pair sites recognised by standard restriction enzymes. The nucleotide sequence was altered to remove existing restriction sites and a limited number of restriction sites were engineered into the gene at defined positions. The precise locations of these restriction sites are indicated by boxes. The amino acid sequence encoded by the synthesised nucleotides is shown. The sequences are coloured according to the domains they represent: the colour scheme adopted in Figure S1 is used. **B.** The nucleotide sequences encoding the portions of the proteins targeted for secretion were codon optimised for expression in *E. coli*. Subsequently, the sequence was edited to remove six base pair sites recognised by standard restriction sites. The amino acid sequence encoded by the synthesised nucleotides is shown.
