# Supplementary material for: A generalised module for the selective extracellular accumulation of recombinant proteins
Source: PubMed Central journal article supplement (PMC3419692; doi:10.1186/1475-2859-11-69), 2012-05-28
Supplement: 1475-2859-11-69-S3.pdf [file 1475-2859-11-69-S3.pdf]

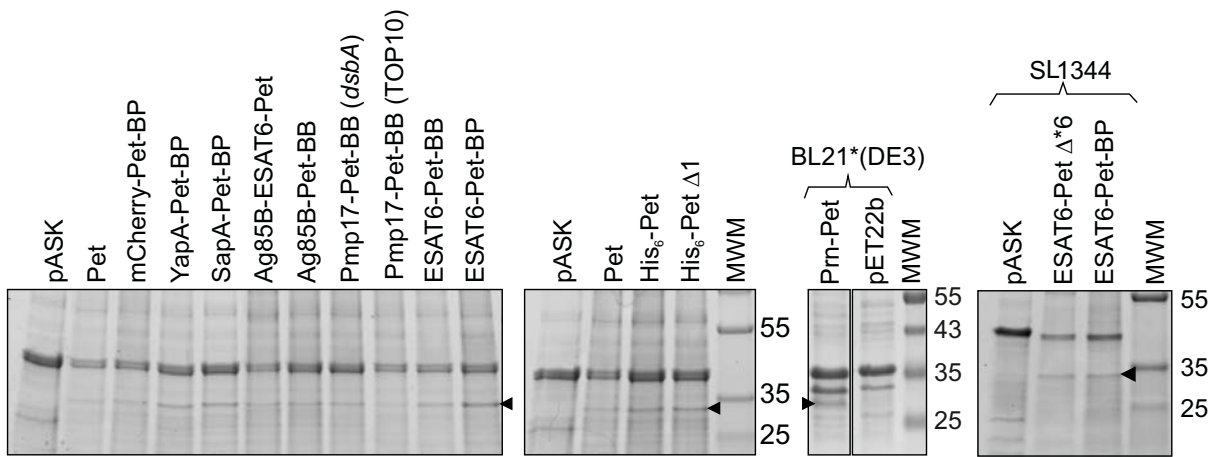

**Figure S3. AT-mediated accumulation of heterologous proteins in the culture medium.**

SDS-PAGE analyses of the OM fractions corresponding to the culture supernatant fractions depicted in Figure 1 are shown. The presence in the OM of the cleaved Pet  $\beta$ -barrel domain is indicated with an arrow. The size of molecular weight markers (MWM, kDa) is indicated on the right of the panel.
