# Supplementary material for: A generalised module for the selective extracellular accumulation of recombinant proteins
Source: PubMed Central journal article supplement (PMC3419692; doi:10.1186/1475-2859-11-69), 2012-05-28
Supplement: 1475-2859-11-69-S4.pdf [file 1475-2859-11-69-S4.pdf]

**Table S1.** Mass spectrometry analysis of some recombinant protein fusions with Pet.

| Fusion protein | Coverage | # PSMs | # Peptides | # AAs | Score   | Description                                                                                                                                                                                                         |
|----------------|----------|--------|------------|-------|---------|---------------------------------------------------------------------------------------------------------------------------------------------------------------------------------------------------------------------|
| YapA-Pet-BP    | 35.24    | 1357   | 55         | 1430  | 5376.35 | putative autotransporter protein [ <i>Yersinia pestis</i> CA88-4125]                                                                                                                                                |
|                | 13.82    | 638    | 24         | 1295  | 1852.07 | RecName: Full=Serine protease pet autotransporter; Contains: RecName: Full=Serine protease pet; AltName: Full=Plasmid-encoded toxin pet; Contains: RecName: Full=Serine protease pet translocator; Flags: Precursor |
| Ag85B-Pet-BB   | 41.62    | 1522   | 63         | 1295  | 5215.18 | RecName: Full=Serine protease pet autotransporter; Contains: RecName: Full=Serine protease pet; AltName: Full=Plasmid-encoded toxin pet; Contains: RecName: Full=Serine protease pet translocator; Flags: Precursor |
|                | 8.42     | 72     | 2          | 285   | 255.16  | Chain A, Mycobacterium Tuberculosis Antigen 85b With Trehalose                                                                                                                                                      |
|                | 7.38     | 72     | 2          | 325   | 255.16  | secreted antigen Ag85B [ <i>Mycobacterium tuberculosis</i> ]                                                                                                                                                        |
| Pertactin-Pet  | 8.80     | 572    | 18         | 1295  | 1422.29 | RecName: Full=Serine protease pet autotransporter; Contains: RecName: Full=Serine protease pet; AltName: Full=Plasmid-encoded toxin pet; Contains: RecName: Full=Serine protease pet translocator; Flags: Precursor |
|                | 22.63    | 325    | 12         | 539   | 1237.01 | Chain A, The Structure Of Bordetella Pertussis Virulence Factor P.69 Pertactin                                                                                                                                      |
| Pmp17-Pet-BB   | 39.15    | 1255   | 58         | 1295  | 4062.94 | RecName: Full=Serine protease pet autotransporter; Contains: RecName: Full=Serine protease pet; AltName: Full=Plasmid-encoded toxin pet; Contains: RecName: Full=Serine protease pet translocator; Flags: Precursor |
|                | 13.71    | 237    | 13         | 839   | 664.93  | polymorphic outer membrane protein [ <i>Chlamydomphila abortus</i> S26/3]                                                                                                                                           |
| ESAT6-Pet-BB   | 40.93    | 1471   | 65         | 1295  | 4929.59 | RecName: Full=Serine protease pet autotransporter; Contains: RecName: Full=Serine protease pet; AltName: Full=Plasmid-encoded toxin pet; Contains: RecName: Full=Serine protease pet translocator; Flags: Precursor |
|                | 38.30    | 97     | 2          | 94    | 530.53  | Chain B, Structure Of The Cfp10-Esat6 Complex From <i>Mycobacterium Tuberculosis</i>                                                                                                                                |
|                | 37.89    | 59     | 2          | 95    | 310.30  | 6 kDa early secreted antigenic protein [ <i>Mycobacterium ulcerans</i> ]                                                                                                                                            |
| ESAT6-Pet-BP   | 33.36    | 1175   | 46         | 1295  | 3500.18 | RecName: Full=Serine protease pet autotransporter; Contains: RecName: Full=Serine protease pet; AltName: Full=Plasmid-encoded toxin pet; Contains: RecName: Full=Serine protease pet translocator; Flags: Precursor |
|                | 38.30    | 130    | 2          | 94    | 604.17  | Chain B, Structure Of The Cfp10-Esat6 Complex From <i>Mycobacterium Tuberculosis</i>                                                                                                                                |
|                | 37.89    | 85     | 2          | 95    | 370.05  | 6 kDa early secreted antigenic protein [ <i>Mycobacterium ulcerans</i> ]                                                                                                                                            |
|                | 37.89    | 67     | 2          | 95    | 363.46  | 6 kDa early secretory antigenic target [ <i>Mycobacterium kansasii</i> ]                                                                                                                                            |
|                | 37.89    | 67     | 2          | 95    | 362.59  | Esat6 [ <i>Mycobacterium riyadhense</i> ]                                                                                                                                                                           |
| SapA-Pet-BP    | 12.66    | 198    | 24         | 1295  | 542.16  | RecName: Full=Serine protease pet autotransporter; Contains: RecName: Full=Serine protease pet; AltName: Full=Plasmid-encoded toxin pet; Contains: RecName: Full=Serine                                             |

|                |       |     |    |      |        |                                                                                                                                                                                                                     |
|----------------|-------|-----|----|------|--------|---------------------------------------------------------------------------------------------------------------------------------------------------------------------------------------------------------------------|
|                |       |     |    |      |        | protease pet translocator; Flags: Precursor                                                                                                                                                                         |
|                | 4.62  | 51  | 3  | 931  | 138.88 | Flagellar protein [Salmonella enterica subsp. enterica serovar Saintpaul str. SARA23]                                                                                                                               |
| mCherry-Pet-BP | 10.19 | 123 | 17 | 1295 | 325.03 | RecName: Full=Serine protease pet autotransporter; Contains: RecName: Full=Serine protease pet; AltName: Full=Plasmid-encoded toxin pet; Contains: RecName: Full=Serine protease pet translocator; Flags: Precursor |
|                | 47.88 | 45  | 16 | 236  | 161.22 | gb AAV52164.1  monomeric red fluorescent protein [synthetic construct]                                                                                                                                              |
