# Supplementary material for: A generalised module for the selective extracellular accumulation of recombinant proteins
Source: PubMed Central journal article supplement (PMC3419692; doi:10.1186/1475-2859-11-69), 2012-05-28
Supplement: 1475-2859-11-69-S6.pdf [file 1475-2859-11-69-S6.pdf]

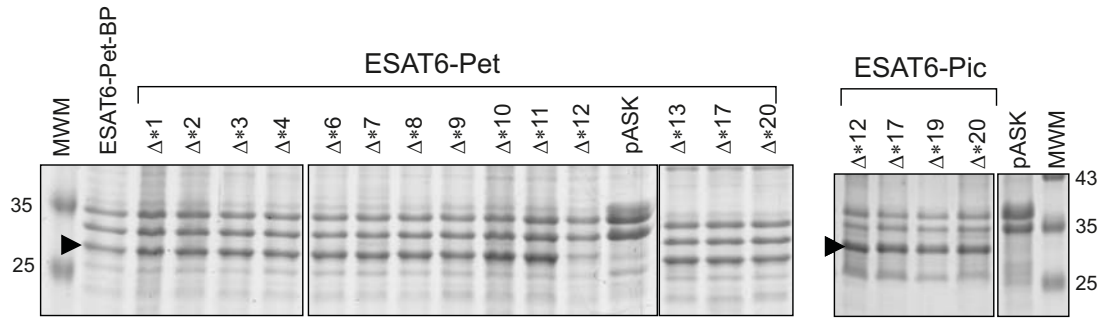

**Figure S5. Identification of minimal AT module permitting secretion of heterologous proteins to the culture supernatant fraction.** SDS-PAGE analyses of the OM fractions corresponding to some culture supernatant fractions depicted in Figure 3 are shown. The presence in the OM of the cleaved Pet and Pic  $\beta$ -barrel domains is indicated with an arrow. The size of molecular weight markers (MWM, kDa) is indicated.
