# Supplementary material for: A generalised module for the selective extracellular accumulation of recombinant proteins
Source: PubMed Central journal article supplement (PMC3419692; doi:10.1186/1475-2859-11-69), 2012-05-28
Supplement: 1475-2859-11-69-S7.pdf [file 1475-2859-11-69-S7.pdf]

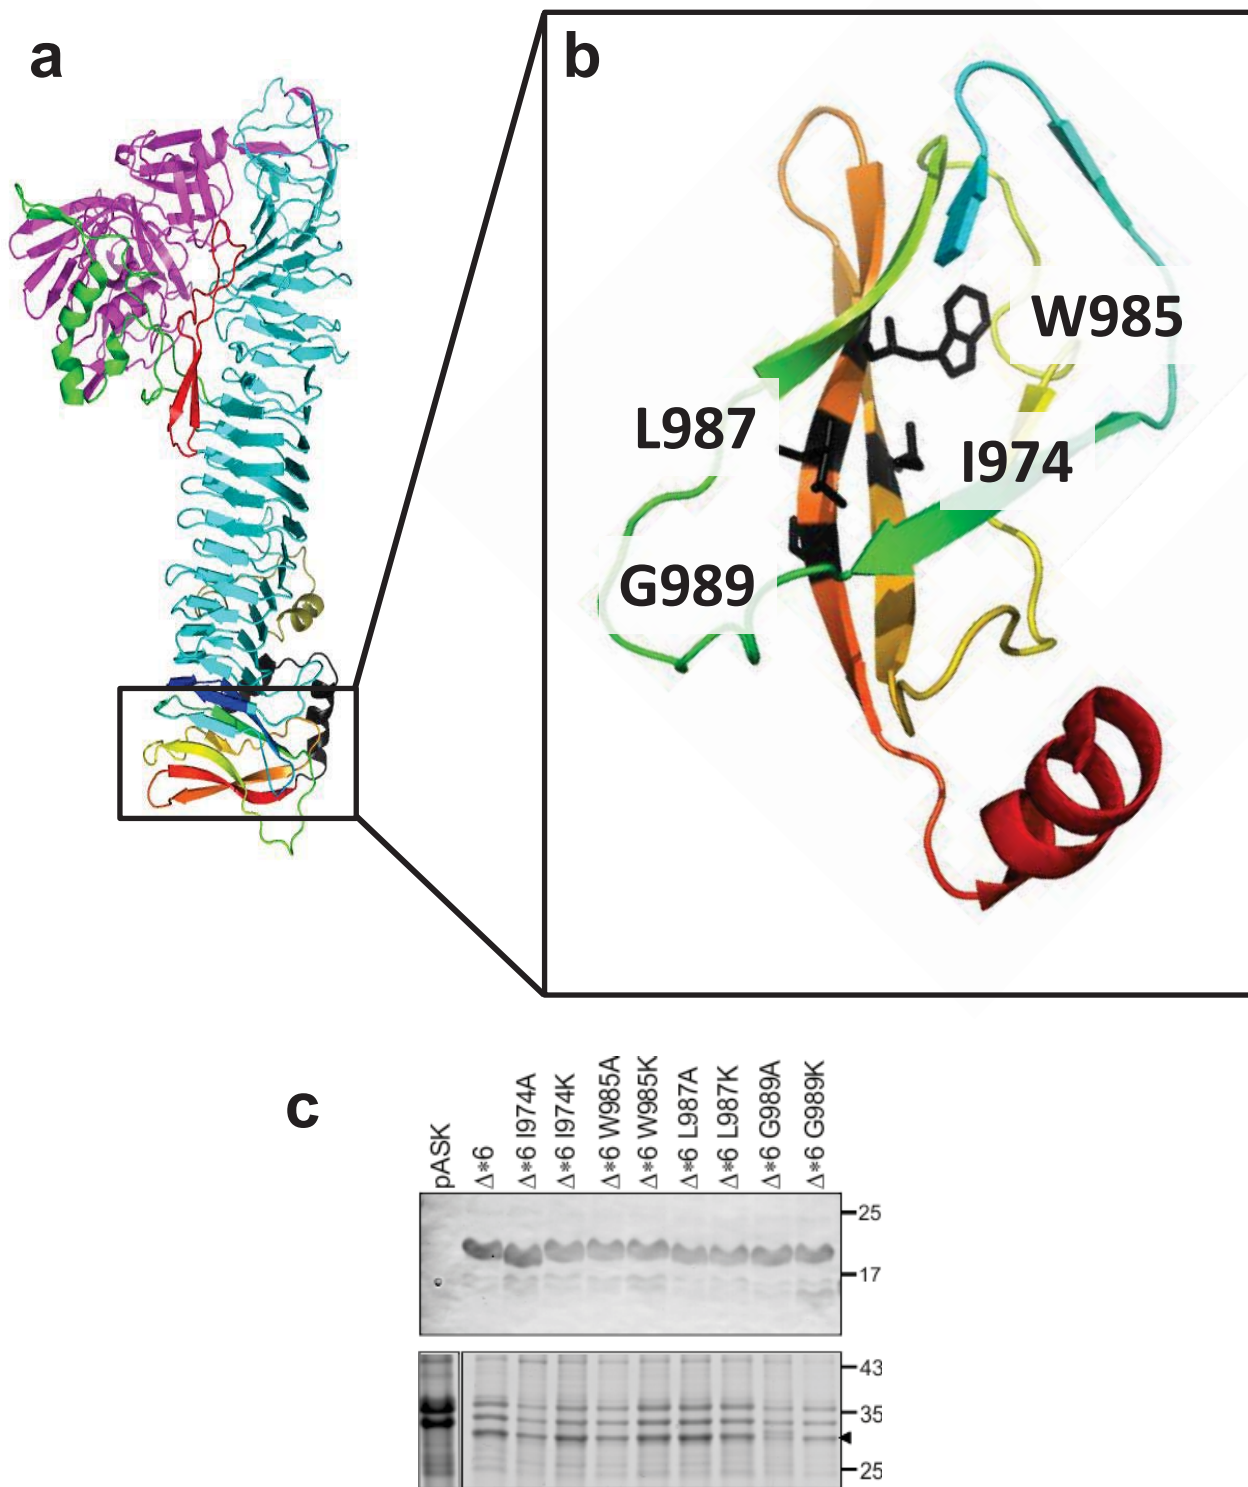

**Figure S6. Impact of conserved amino acids from the AC domain on secretion of heterologous proteins.** **A.** Tertiary structure of the AC- $\alpha$ -helix Pet fragment (Pet 920-1018) showing conserved AC domain core residues, I974, W985, L987 and G989. The positions of the conserved residues are highlighted by black sticks. **B.** Analysis of secretion of ESAT-6 fusions with Pet 958-1295 (as in ESAT6-Pet $\Delta$ \*6, Figure 3) carrying mutations in the conserved residues in the AC domain. TCA-precipitated culture supernatants from *E. coli* TOP10 cultures expressing mutant constructs were analysed by Western blotting with anti-ESAT-6. Samples were derived from equal volumes of culture medium. **C.** SDS-PAGE analysis of OM fractions derived from cultures shown in B. The position of the cleaved  $\beta$ -barrel domain is indicated by an arrow.
