# Supplementary material for: A generalised module for the selective extracellular accumulation of recombinant proteins
Source: PubMed Central journal article supplement (PMC3419692; doi:10.1186/1475-2859-11-69), 2012-05-28
Supplement: 1475-2859-11-69-S8.pdf [file 1475-2859-11-69-S8.pdf]

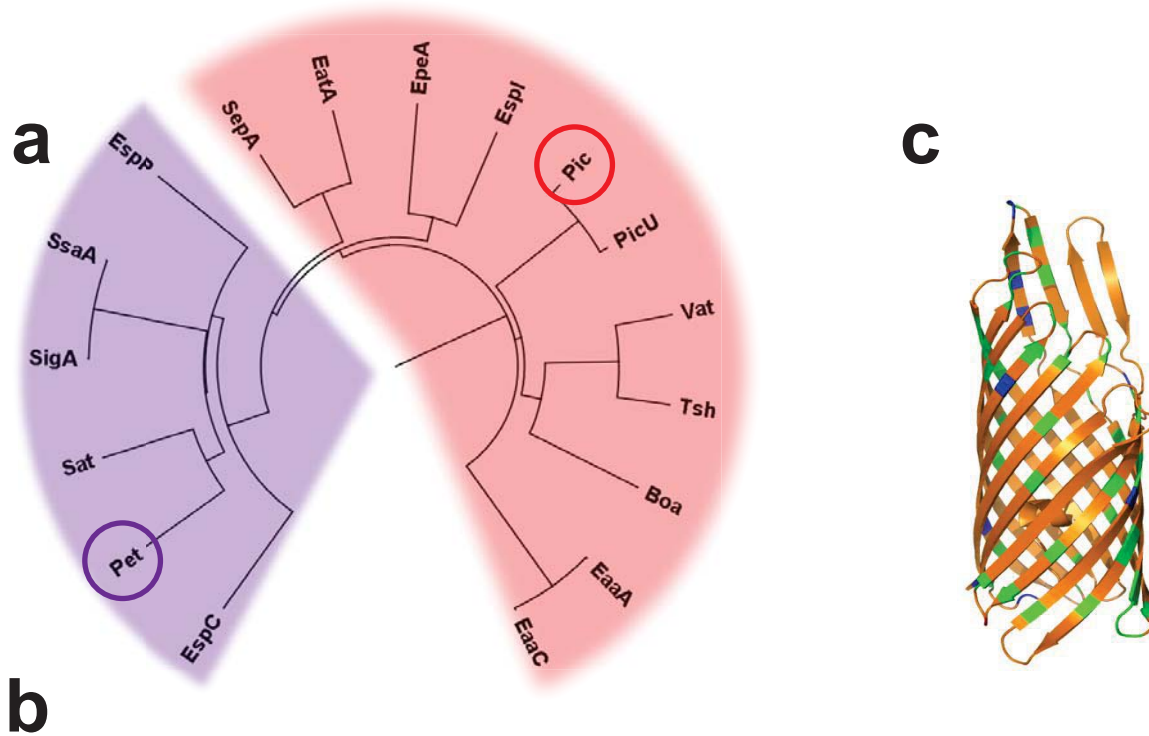

```

Pet      TLTVDELTTNSAFVMRTNTQQADQLIVKNKLEGANLLLVDFIEKKGNDKGNLNIIDLVKAPENTSKDVFKTETQTIGFSDVTP EIKQOEKDGKSVWTLT
Pic      TLTVNKLDATGSDFVLRDLDLKNADKINVTEKATGSDNSLNVSMNPAQG-QALNIPLVTPAGTSAEMFKAGTRVTGFSRVTPTLHVDTSGGNTKWILD
Consensus ***** :.* **:* :.*: *.* *.* *.*: . . . :*** **.* **.* :.*: *.* **.* **.* : . . . : *.*

Pet      GYKTVANADAACKATSLMSGGYKAF LAEVNNLNKRMGDLRD INGEAGAWARIMSGTGSAGGGFSDNYTHVQVGADNKHELDGLDLFTGVTMTYTDSHAGS
Pic      GFKAEDKAAAADKADSFMNAGYKNFMTEVNNLNKRMGDLRD TNGDAGAWARIMSGAGSADGGYSDNYTHVQVGFDKKHELDGVDLFTGVTMTYTDSADS
Consensus *: *.* *.* *.* *.*:*** **.* **.* **.* **.* **.* **.* **.* **.* **.* **.* **.* **.* **.* **.* **.* **.* **.*

Pet      DAFSGETKSVGAGLYASAMFESGAYIDLIGKYIHHDNEYTATFAGLGRDYSSHSWYAGAEVGYRYHVTD SAWIEPQAEVLVYGA VSGKQFSWKDQGMNLT
Pic      HAFSGKTKSVGGGLYASALFESGAYIDLIGKYIHHDNYTGNFASLGTKHYNTHSWYAGAETGYRYHLTEDTFIEPQAEVLVYGA VSGKTFRWKDGMDLS
Consensus .***:*** **.* **.* **.* **.* **.* **.* **.* **.* **.* **.* **.* **.* **.* **.* **.* **.* **.* **.* **.*

Pet      MKDKDFNPLIGRTGVDVGSFSGKDWKVTARAGLGYQFDLFANGETVLRDASGEKRIKGEKDRMLMNVGLNAEIRDNVRFGLEFEKSAFGKYNVDNAIN
Pic      MKNRDFSPLVGRGTGVELGKTFSGKDWKVTARAGTSWQFDLLNNGETVLRDASGEKRIKGEKDRMLFNVMNAQIKDNMRFGLEFEKSAFGKYNVDNAVN
Consensus **: **.* **.* **.* **.* **.* **.* **.* **.* **.* **.* **.* **.* **.* **.* **.* **.* **.* **.* **.*

Pet      ANFRYSF
Pic      ANFRYMF
Consensus ***** *

```

**Figure S7. Comparison of the Pic and Pet SPATE proteins.** **A.** Phylogenetic tree of SPATE family members. Pic clusters with the extracellular proteases (pink shading) and is located on a separate branch to Pet which is grouped with the toxins (purple shading). **B.** Amino acid sequence alignment of Pic and Pet. Identical residues are marked with asterisks and conserved residues with dots. The position of the cleavage site, which separates the passenger domain from the  $\beta$ -domain, is highlighted by red triangles. **C.** Model of Pet  $\beta$ -domain demonstrating the position of amino acid residues which are not identical in Pic. Conserved residues are highlighted by green shading. Non-identical residues are denoted by blue shading.
