# Supplementary material for: A generalised module for the selective extracellular accumulation of recombinant proteins
Source: PubMed Central journal article supplement (PMC3419692; doi:10.1186/1475-2859-11-69), 2012-05-28
Supplement: 1475-2859-11-69-S9.pdf [file 1475-2859-11-69-S9.pdf]

**Table S2. Plasmids used in this study.**

| <b>Plasmid</b>                 | <b>Relevant characteristics</b>                                                                                                                                                              | <b>Reference</b>               |
|--------------------------------|----------------------------------------------------------------------------------------------------------------------------------------------------------------------------------------------|--------------------------------|
| pBADPet                        | pBADHisA carrying <i>de novo</i> synthesized <i>pet</i> gene, Amp <sup>r</sup>                                                                                                               | Leyton et al., 2010            |
| pBADPet*                       | pBADPet derivative expressing non cleaved Pet mutant, Pet*, with N1018G and D1115G substitutions                                                                                             | Leyton et al., 2010            |
| pASK-IBA33plus                 | Expression vector, <i>tet</i> promoter/operator, Amp <sup>r</sup>                                                                                                                            | IBA BioTAGnology               |
| pET22b                         | Expression vector, <i>T7lac</i> promoter, Amp <sup>r</sup>                                                                                                                                   | Novagen                        |
| pPic1                          | pACYC184 plasmids with insertion of <i>pic</i> gene from <i>E. coli</i> 042                                                                                                                  | Henderson et al., 1999         |
| pASK-Pet                       | pASK-IBA33plus expressing Pet, Amp <sup>r</sup>                                                                                                                                              | This study                     |
| pASK-Pet*                      | pASK-Pet derivative expressing non cleaved Pet mutant, Pet*, with N1018G and D1115G substitutions                                                                                            | This study                     |
| pASK-His <sub>6</sub> -Pet     | pASK-Pet encoding Pet with a His <sub>6</sub> -tag incorporated after signal sequence                                                                                                        | This study                     |
| pASK-His <sub>6</sub> -Pet-ΔD1 | Similar to pASK-His <sub>6</sub> -Pet; encodes Pet deleted of domain 1                                                                                                                       | This study                     |
| pET-Pet                        | pET22b expressing Pet, Amp <sup>r</sup>                                                                                                                                                      | This study                     |
| pMA-ESAT6                      | pMA cloning vector carrying <i>de novo</i> synthesized <i>esxA</i> gene encoding ESAT-6 from <i>Mycobacterium tuberculosis</i> ; Amp <sup>r</sup>                                            | GenScript/This study           |
| pMA-Ag85B                      | pMA cloning vector containing <i>de novo</i> synthesized <i>fbpB</i> gene encoding putative esterase, antigen 85-B (Ag85B) from <i>Mycobacterium tuberculosis</i> , Amp <sup>r</sup>         | GenScript/This study           |
| pET-Pmp17                      | pET22b containing <i>de novo</i> synthesized <i>pmp17G</i> gene encoding polymorphic outer membrane protein Pmp17 from <i>Chlamydomophila abortus</i> , Amp <sup>r</sup>                     | GenScript/This study           |
| pET-SapA                       | pET22b containing <i>de novo</i> synthesized <i>yaiT</i> gene encoding putative secreted protein SapA from <i>Salmonella enterica subsp. enterica serovar Typhimurium</i> , Amp <sup>r</sup> | GenArt/This study              |
| pET-YapA                       | pET22b containing <i>de novo</i> synthesized <i>yapA</i> gene encoding putative secreted protein YapA from <i>Yersinia pestis</i> , Amp <sup>r</sup>                                         | Epoch Life Science /This study |
| pUC74-mCherry                  | pUC74 cloning containing <i>de novo</i> synthesized <i>mcherry</i> gene encoding monomeric red fluorescent protein mCherry, Amp <sup>r</sup>                                                 | GenScript/This study           |
| pASK-ESAT6-Pet-BB              | pASK-Pet with <i>esxA</i> insertion between BglII/BstBI sites of <i>pet</i>                                                                                                                  | This study                     |
| pASK-ESAT6-Pet*                | pASK-Pet-ESAT6-BB expressing non cleaved ESAT6-Pet* fusion with N1018G and D1115G substitutions in Pet translocation domain                                                                  | This study                     |
| pASK-ESAT6-Pet-BP              | pASK-Pet with <i>esxA</i> insertion between BglII/PstI sites of <i>pet</i>                                                                                                                   | This study                     |
| pASK-Ag85B-Pet-BB              | pASK-Pet with <i>fbpB</i> insertion between BglII/BstBI sites of <i>pet</i>                                                                                                                  | This study                     |
| pASK-Ag85B-ESAT6-Pet           | pASK-Ag85B-Pet-BB with <i>esxA</i> insertion between BstBI/PstI sites of <i>pet</i>                                                                                                          | This study                     |
| pASK-Pmp17-Pet-BB              | pASK-Pet with insertion of the part of <i>pmp17G</i> gene encoding predicted extracellular domain of Pmp17 between BglII/BstBI sites of <i>pet</i>                                           | This study                     |

|                                       |                                                                                                                                                          |                      |
|---------------------------------------|----------------------------------------------------------------------------------------------------------------------------------------------------------|----------------------|
| pASK-His <sub>6</sub> -Pmp17-Pet-BB   | pASK-Pmp17-Pet-BB with the His <sub>6</sub> -tag engineered after Pet signal sequence cleavage site                                                      | This study           |
| pASK-SapA-Pet-BP                      | pASK-Pet with insertion of the part of <i>yaiT</i> gene encoding predicted extracellular domain of SapA between <i>BglIII/PstI</i> sites of <i>pet</i>   | This study           |
| pASK-His <sub>6</sub> -SapA-Pet-BP    | pASK-SapA-Pet-BP with the His <sub>6</sub> -tag engineered after Pet signal sequence cleavage site                                                       | This study           |
| pASK-YapA-Pet-BP                      | pASK-Pet with insertion of the part of <i>yapA</i> gene encoding predicted extracellular domain of YapA between <i>BglIII/PstI</i> sites of <i>pet</i>   | This study           |
| pASK-His <sub>6</sub> -YapA-Pet-BP    | pASK-YapA-Pet-BP with the His <sub>6</sub> -tag engineered after Pet signal sequence cleavage site                                                       | This study           |
| pASK-mCherry-Pet-BP                   | pASK-Pet with <i>mcherry</i> insertion between <i>BglIII/PstI</i> sites of <i>pet</i>                                                                    | This study           |
| pASK-His <sub>6</sub> -mCherry-Pet-BP | pASK-mCherry-Pet-BP with the His <sub>6</sub> -tag engineered after Pet signal sequence cleavage site                                                    | This study           |
| pASK-mCherry-Pet*                     | pASK-Pet-mCherry-BP expressing non cleaved mCherry-Pet* fusion with N1018G and D1115G substitutions in Pet translocation domain                          | This study           |
| pET-Prn-Pet                           | pET22b containing <i>de novo</i> synthesized <i>prn-pet</i> sequence encoding extracellular domain of Pertactin (P69.C) from <i>Bordetella pertussis</i> | GenScript/This study |
| pASK-ESAT6-Pet Δ*1                    | pASK-ESAT6-Pet-BP derivative containing truncated 3' <i>pet</i> gene fragment corresponding to Pet 840-1295 protein sequence                             | This study           |
| pASK-ESAT6-Pet Δ*2                    | As above, contains <i>pet</i> fragment encoding Pet 889-1295                                                                                             | This study           |
| pASK-ESAT6-Pet Δ*3                    | As above, contains <i>pet</i> fragment encoding Pet 925-1295                                                                                             | This study           |
| pASK-ESAT6-Pet Δ*4                    | As above, contains <i>pet</i> fragment encoding Pet 936-1295                                                                                             | This study           |
| pASK-ESAT6-Pet Δ*5                    | As above, contains <i>pet</i> fragment encoding Pet 947-1295                                                                                             | This study           |
| pASK-ESAT6-Pet Δ*6                    | As above, contains <i>pet</i> fragment encoding Pet 958-1295                                                                                             | This study           |
| pASK-ESAT6-Pet Δ*7                    | As above, contains <i>pet</i> fragment encoding Pet 960-1295                                                                                             | This study           |
| pASK-ESAT6-Pet Δ*8                    | As above, contains <i>pet</i> fragment encoding Pet 962-1295                                                                                             | This study           |
| pASK-ESAT6-Pet Δ*9                    | As above, contains <i>pet</i> fragment encoding Pet 964-1295                                                                                             | This study           |
| pASK-ESAT6-Pet Δ*10                   | As above, contains <i>pet</i> fragment encoding Pet 966-1295                                                                                             | This study           |
| pASK-ESAT6-Pet Δ*11                   | As above, contains <i>pet</i> fragment encoding Pet 968-1295                                                                                             | This study           |
| pASK-ESAT6-Pet Δ*12                   | As above, contains <i>pet</i> fragment encoding Pet 971-1295                                                                                             | This study           |
| pASK-ESAT6-Pet Δ*13                   | As above, contains <i>pet</i> fragment encoding Pet 975-1295                                                                                             | This study           |
| pASK-ESAT6-Pet Δ*14                   | As above, contains <i>pet</i> fragment encoding Pet 979-1295                                                                                             | This study           |
| pASK-ESAT6-Pet Δ*15                   | As above, contains <i>pet</i> fragment encoding Pet 982-1295                                                                                             | This study           |
| pASK-ESAT6-Pet Δ*16                   | As above, contains <i>pet</i> fragment encoding Pet 985-1295                                                                                             | This study           |
| pASK-ESAT6-Pet Δ*17                   | As above, contains <i>pet</i> fragment encoding Pet 988-1295                                                                                             | This study           |
| pASK-ESAT6-Pet Δ*18                   | As above, contains <i>pet</i> fragment encoding Pet 994-1295                                                                                             | This study           |
| pASK-ESAT6-Pet Δ*19                   | As above, contains <i>pet</i> fragment encoding Pet 1002-1295                                                                                            | This study           |
| pASK-ESAT6-Pet Δ*20                   | As above, contains <i>pet</i> fragment encoding Pet 1010-1295                                                                                            | This study           |

|                          |                                                                                                                                                                                                |            |
|--------------------------|------------------------------------------------------------------------------------------------------------------------------------------------------------------------------------------------|------------|
| pASK-ESAT6-Pic Δ*6       | pASK-ESAT6-Pet Δ*6 in which 3' <i>PstI-HindIII</i> fragment of <i>pet</i> gene was replaced with the equivalent fragment from <i>pic</i> gene corresponding to Pic 1035-1372 protein sequence  | This study |
| pASK-ESAT6-Pic Δ*12      | pASK-ESAT6-Pet Δ*12 in which 3' <i>PstI-HindIII</i> fragment of <i>pet</i> gene was replaced with the equivalent fragment from <i>pic</i> gene corresponding to Pic 1048-1372 protein sequence | This study |
| pASK-ESAT6-Pic Δ*17      | pASK-ESAT6-Pet Δ*17 in which 3' <i>PstI-HindIII</i> fragment of <i>pet</i> gene was replaced with the equivalent fragment from <i>pic</i> gene corresponding to Pic 1065-1372 protein sequence | This study |
| pASK-ESAT6-Pic Δ*19      | pASK-ESAT6-Pet Δ*19 in which 3' <i>PstI-HindIII</i> fragment of <i>pet</i> gene was replaced with the equivalent fragment from <i>pic</i> gene corresponding to Pic 1079-1372 protein sequence | This study |
| pASK-ESAT6-Pic Δ*20      | pASK-ESAT6-Pet Δ*20 in which 3' <i>PstI-HindIII</i> fragment of <i>pet</i> gene was replaced with the equivalent fragment from <i>pic</i> gene corresponding to Pic 1087-1372 protein sequence | This study |
| pASK-ESAT6-Pet Δ*6 L987A | pASK-ESAT6-Pet Δ*6 derivative carrying L987→A substitution in AC domain                                                                                                                        | This study |
| pASK-ESAT6-Pet Δ*6 L987K | pASK-ESAT6-Pet Δ*6 derivative carrying L987→K substitution in AC domain                                                                                                                        | This study |
| pASK-ESAT6-Pet Δ*6 G989A | pASK-ESAT6-Pet Δ*6 derivative carrying G989→A substitution in AC domain                                                                                                                        | This study |
| pASK-ESAT6-Pet Δ*6 G989K | pASK-ESAT6-Pet Δ*6 derivative carrying G989→K substitution in AC domain                                                                                                                        | This study |
| pASK-ESAT6-Pet Δ*6 W985A | pASK-ESAT6-Pet Δ*6 derivative carrying W985→A substitution in AC domain                                                                                                                        | This study |
| pASK-ESAT6-Pet Δ*6 W985K | pASK-ESAT6-Pet Δ*6 derivative carrying W985→K substitution in AC domain                                                                                                                        | This study |
| pASK-ESAT6-Pet Δ*6 I974A | pASK-ESAT6-Pet Δ*6 derivative carrying I974→A substitution in AC domain                                                                                                                        | This study |
| pASK-ESAT6-Pet Δ*6 I974K | pASK-ESAT6-Pet Δ*6 derivative carrying I974→K substitution in AC domain                                                                                                                        | This study |
