# Supplementary material for: A generalised module for the selective extracellular accumulation of recombinant proteins
Source: PubMed Central journal article supplement (PMC3419692; doi:10.1186/1475-2859-11-69), 2012-05-28
Supplement: 1475-2859-11-69-S10.pdf [file 1475-2859-11-69-S10.pdf]

**Table S3. Primers used in this study.**

| Primer                    | Sequence (5'-3')*                                              |
|---------------------------|----------------------------------------------------------------|
| BsaI-pet-F                | ATGGTAGGTCTCAAATGAACAAAATCTACTCTATC                            |
| HindIII-pet-R             | GCGCAAGCTTTTATCAATGATGATGATGATGATGACC                          |
| SacI-pet-F                | TTTCTGAGCTCGCCAAAAAAGTTATCTGC                                  |
| PetSS-BglII-AflII-BstBI-R | TTCGAACTTAAGAGATCTAGGTGATGGTGATGGTGATGCGCCGCGTATGATGTTGGTGTAAG |
| BglII-ESAT6-F             | GCGAGATCTGATGACCGAACAGCAGTGGAAAC                               |
| BstBI-ESAT6-F             | GGCGTTTCGAAAATGACCGAACAGCAGTGGAAAC                             |
| BstBI-ESAT6-R             | TATATTCGAATCGCCGCCAGCGAACATG                                   |
| PstI-ESAT6-R              | ATCCTGCAGAGCCGCCAGCGAACATGC                                    |
| BglII-Ag85B-F             | CCAAGATCTGATGACCGACGTTTCTCGTAA                                 |
| BstBI-Ag85B-R             | TCCCTTCGAATCGCCGCCACCAGCACCCAG                                 |
| BglII-Pmp17-F             | AATAAGATCTGAACGACGCGCAGACCCG                                   |
| BstBI-Pmp17-R             | TATATTCGAATCCGCCAGTTTCGCCGGAG                                  |
| BglII-SapA-F              | GCCGAGATCTGACCACCTATGATACCTGGACC                               |
| PstI-SapA-R               | CCGGCTGCAGAGCCATCGCTGTTTCATCGCAATG                             |
| BglII-YapA-F              | ACGTAGATCTGGTTTCTCAGATCGCGACCACCG                              |
| PstI-YapA-R               | TAGCCTGCAGACGCGTTAGACATGTCAACCGTACC                            |
| BglII-mCherry-F           | GCCGAGATCTGATGGTTTCTAAAGGTGAAGAAGAC                            |
| PstI-mCherry-R            | CCGTCTGCAGATTTATACAGTTCGTCCATACCCG                             |
| PstI-TSYQ-del1-F          | TATGCTGCAGACACCTCTTACCAGGGTTCTATCAAAGC                         |
| PstI-TLTV-del2-F          | TATACTGCAGACACCCTGACCGTTGACGAACTGACC                           |
| PstI-NLLL-del3-F          | TATACTGCAGACAACCTGCTGCTGGTCGACTTCATCG                          |
| PstI-TPEI-del12-F         | TATACTGCAGACACCCCGGAAATCAAACAGCAGG                             |
| PstI-YKAF-del20-F         | TATGCTGCAGACTACAAAGCGTTCCTGGCGGAAG                             |
| PstI-GNDK-del4-F          | TATGCTGCAGACGGTAACGACAAAAACGGTCTGAAC                           |
| PstI-VKAP-del5-F          | TATACTGCAGACGTTAAAGCGCCGGAAAACACCTC                            |
| PstI-FKTE-del6-F          | TATGCTGCAGACTTCAAACCGGAAACCCAGACCATC                           |
| PstI-TGYK-del17-F         | TATCCTGCAGACACCCGGCTACAAAACCGTTGCG                             |
| PstI-TETQ-del7-F          | TATACTGCAGACACCGAAAACCCAGACCATCGG                              |
| PstI-TQTI-del8-F          | TATACTGCAGACACCCAGACCATCGGTTTCTCTG                             |
| PstI-TIGF-del9-F          | CATACTGCAGACACCATCGGTTTCTCTGACGTTACC                           |
| PstI-GFSD-del10-F         | TGTACTGCAGACGGTTTCTCTGACGTTACCCCG                              |
| PstI-SDVT-del11-F         | TCTGCTGCAGACTCTGACGTTACCCCGGAAATC                              |
| PstI-KQQE-del13-F         | GGCACTGCAGACAAACAGCAGGAAAAAGACGGTAAATC                         |
| PstI-KDG-del14-F          | GGCACTGCAGACAAAGACGGTAAATCTGTTTGACC                            |
| PstI-KSV-del15-F          | GGCACTGCAGACAAATCTGTTTGACCCTGACC                               |
| PstI-WTL-del16-F          | TATACTGCAGACTGGACCCTGACCGGCTACAAAACC                           |
| PstI-ANAD-del18-F         | GGCACTGCAGACGCGAACGCGGACGCGGCG                                 |
| PstI-ATSL-del19-F         | GGCACTGCAGACGCGACCTCTCTGATGTCTGGTGG                            |
| SbfI-FKAG-Pic-del6-F      | GGCACCTGCAGGCTTTAAGGCCGGCACCCGGGTGAC                           |
| SbfI-TPTL-Pic-del12-F     | GGCACCTGCAGGCACCCCAACCCTGCATGTTGATACC                          |
| SbfI-DGFK-Pic-del17-F     | GGCACCTGCAGGCGATGGTTTTAAAGCGGAGGCTGATAAAG                      |
| SbfI-ADSF-Pic-del19-F     | GGCACCTGCAGGCGCTGACAGTTTCATGAATGCCGGG                          |
| SbfI-YKNF-Pic-del20-F     | GGCACCTGCAGGCTATAAAAACCTTCATGACGGAAGTTAAC                      |
| HindIII-Pic-end-R         | GCGCAAGCTTTCAGAACATATACCGGAAATTCGCG                            |
| pASK-IBA33+ For seq       | GAGTTATTTTACCCTCCCT                                            |
| pASK-IBA33+ Rev seq       | CGCAGTAGCGGTAACG                                               |
| pet600For seq             | ATCTTCTGCGAACTACC                                              |
| pet1320For seq            | GGTGGTTTTCATCTTCGA                                             |
| pet2880For seq            | TCTTCAACACCCTGACC                                              |
| pet3660For seq            | TTCTCACTCTTGCTACG                                              |
| pet2041For seq (Spe/BstG) | TTCTGACCTGTCTCAGC                                              |
| pet2710 For seq           | TACCAGGGTTCTATCAAAGCG                                          |
| pet2731 Rev seq           | CCGCTTTGATAGAACCCTGG                                           |

|                                          |                                      |
|------------------------------------------|--------------------------------------|
| pet3401 Rev seq                          | TCCAGACCGTCCAGTTCG                   |
| <b>Site directed mutagenesis primers</b> |                                      |
| AC Ile to Ala F                          | GACGTTACCCCGGAAGCGAAACAGCAGGAAAAAG   |
| AC Ile to Ala R                          | CTTTTCCTGCTGTTTCGCTTCCGGGGTAACGTC    |
| AC Ile to Lys F                          | GACGTTACCCCGGAAAAAAAACAGCAGGAAAAAG   |
| AC Ile to Lys R                          | CTTTTCCTGCTGTTTTTTTCCGGGGTAACGTC     |
| AC W to Ala F                            | AAAGACGGTAAATCTGTTGCGACCCTGACCGGCTAC |
| AC W to Ala R                            | GTAGCCGGTCAGGGTCGCAACAGATTACCGTCTTT  |
| AC W to Lys F                            | AAAGACGGTAAATCTGTTAAAACCCTGACCGGCTAC |
| AC W to Lys R                            | GTAGCCGGTCAGGGTTTTAACAGATTACCGTCTTT  |
| AC Leu to Ala F                          | GTAAATCTGTTTGGACCGCGACCGGCTACAAAACC  |
| AC Leu to Ala R                          | GGTTTTGTAGCCGGTCGCGGTCCAAACAGATTAC   |
| AC Leu to Lys F                          | GTAAATCTGTTTGGACCAAAACCAGGCTACAAAACC |
| AC Leu to Lys R                          | GGTTTTGTAGCCGGTTTTGGTCCAAACAGATTAC   |
| AC Gly to Ala F                          | CTGTTTGGACCCTGACCGCGTACAAAACCGTTGCG  |
| AC Gly to Ala R                          | CGCAACGGTTTTGTACGCGGTTCAGGGTCCAAACAG |
| AC Gly to Lys F                          | CTGTTTGGACCCTGACCAAAATACAAAACCGTTGCG |
| AC Gly to Lys R                          | CGCAACGGTTTTGTATTTGGTTCAGGGTCCAAACAG |

\* Restriction sites engineered on primers are in **bold font**; mutated nucleotides are in grey
